# Supplementary material for: Controlled synthesis of double-shelled CeO2 hollow spheres and enzyme-free electrochemical bio-sensing properties for uric acid
Source: Royal Society of Chemistry journal article supplement (doi:10.1039/c2jm32804f), 2012-01-01
Supplement: c2jm32804f.pdf [file c2jm32804f.pdf]

# Controlled Synthesis of Double-Shelled CeO<sub>2</sub> Hollow Spheres and Enzyme-free Electrochemical Bio-Sensing Properties for Uric Acid

Lijun Han,<sup>†</sup> Rongji Liu,<sup>†,||</sup> Chunshan Li,<sup>†</sup> Honghua Li,<sup>†</sup> Cuixia Li,<sup>†,||</sup> Guangjin Zhang,<sup>\*,†</sup> and Jiannian Yao<sup>‡</sup>

<sup>†</sup>Beijing Key Laboratory of Ionic Liquids Clean Process, State Key Laboratory of Multiphase Complex System, Key Laboratory of Green Process and Engineering, Institute of Process Engineering, Chinese Academy of Sciences, Beijing 100190, PR China

<sup>‡</sup>Beijing National Laboratory for Molecular Science, Key Laboratory of Photochemistry, Institute of Chemistry, Chinese Academy of Science, 100190, Beijing, China

<sup>||</sup>Graduate University of Chinese Academy of Sciences, 100190 Beijing, China

## Supporting Information

1. Fig. S1 TG curve of as-obtained double-shelled CeO<sub>2</sub> HSs.

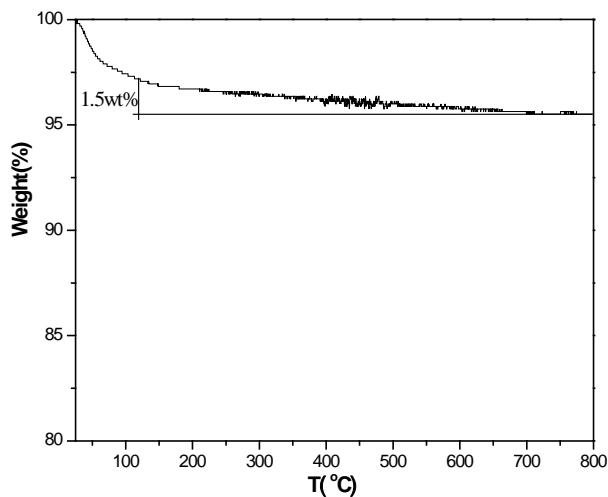

Fig. S1 TG curve of as-obtained double-shelled CeO<sub>2</sub> HSs

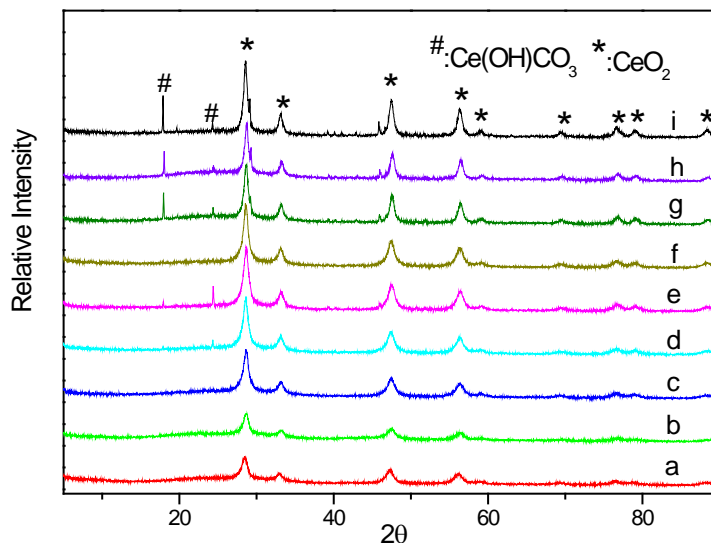

Fig. S2 XRD patterns of the intermediates at different time after the solvothermal process.  
a) 50min, b) 1h, c) 2h, d) 3h, e) 4h, f) 5h, g) 10h, h) 15h, i) 20h.

XRD analysis was performed to check the composition of these products at different solvothermal stages and the results were shown in Fig. S2. All the products were mainly composed of cubic phase  $\text{CeO}_2$ . Some trace amount of  $\text{Ce(CO}_3\text{)OH}$  can be found in the samples when reaction time was prolonged to more than 3h. During the solvothermal process, trace  $\text{CO}_2$  was formed by oxidation of PEG after prolonged reaction time. Due to the appearance of  $\text{H}_2\text{O}$  in the reaction, trace  $\text{Ce}^{3+}$  existed in the form of  $[\text{Ce(H}_2\text{O)}_n]^{3+}$ , and then changed into  $[\text{Ce(OH)(H}_2\text{O)}_{n-1}]^{2+}$ , which reacted with  $\text{CO}_3^{2-}$  in the solution to form  $\text{Ce(CO}_3\text{)OH}$ , finally. Since the oxidation of PEG to form  $\text{CO}_2$  is a relative slow process, the formation of ceria hydroxy carbonate phase can only be observed at prolonged reaction time. It should be noted that all these trace impurities can be entirely removed by following heat treatment and the final product is a pure  $\text{CeO}_2$  phase.
